# Supplementary figures and images for: The distribution of antibiotic use and its association with antibiotic resistance
Source: eLife journal article supplement (doi:10.7554/elife.39435), 2018-12-17

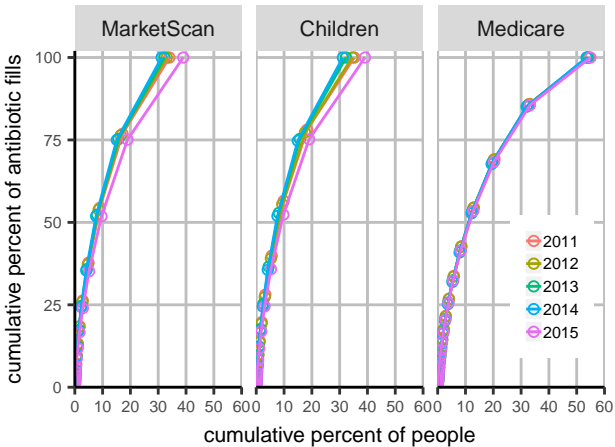

Supplement: supp [file elife_poa_e39435_Figure_1_figure_supplement_1.pdf › elife_poa_e39435_Figure_1_figure_supplement_1.pdf]

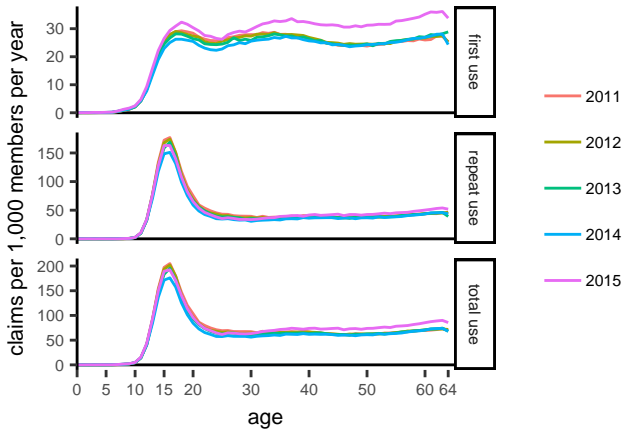

Supplement: supp [file elife_poa_e39435_Figure_2_figure_supplement_1.pdf › elife_poa_e39435_Figure_2_figure_supplement_1.pdf]

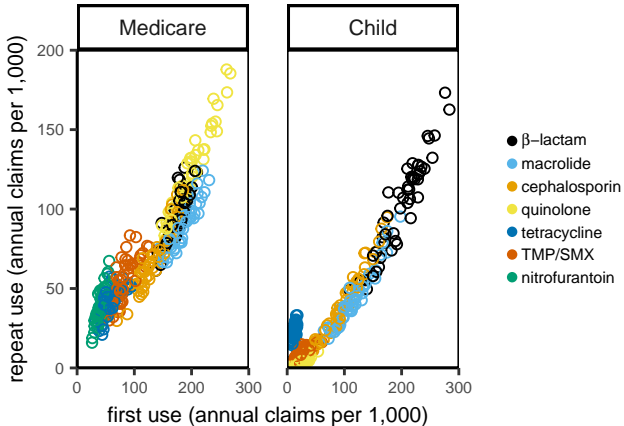

Supplement: supp [file elife_poa_e39435_Figure_2_figure_supplement_2.pdf › elife_poa_e39435_Figure_2_figure_supplement_2.pdf]

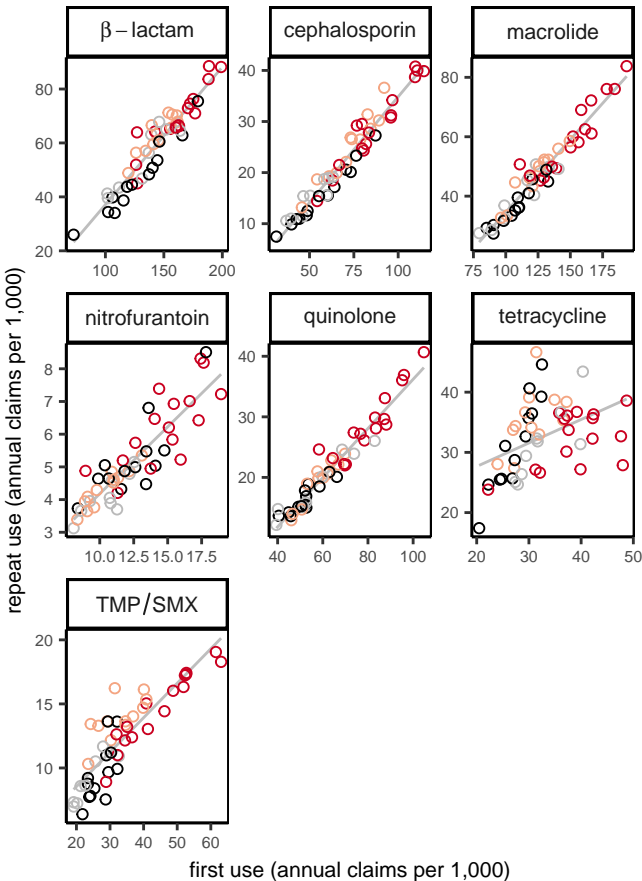

Supplement: supp [file elife_poa_e39435_Figure_2_figure_supplement_3.pdf › elife_poa_e39435_Figure_2_figure_supplement_3.pdf]

Not IP only

OP/ER only

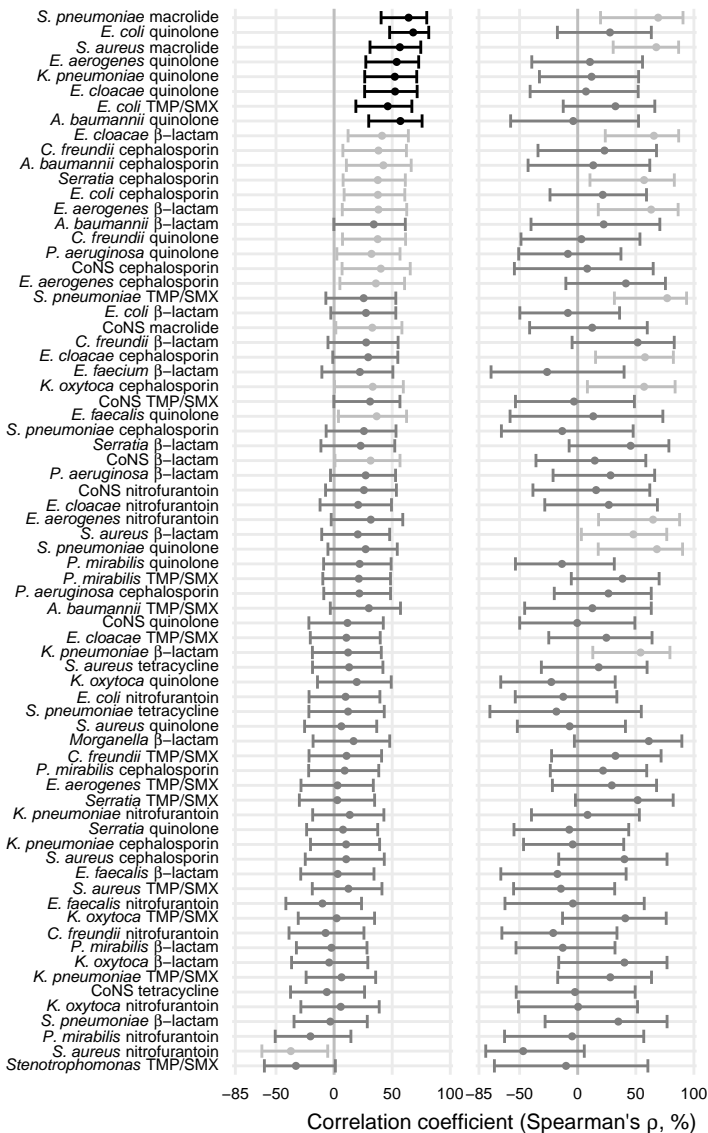

Supplement: supp [file elife_poa_e39435_Figure_3_figure_supplement_1.pdf › elife_poa_e39435_Figure_3_figure_supplement_1.pdf]
